# Supplementary material for: Electrochemically reduced graphene oxide-enhanced electropolymerization of poly-xanthurenic acid for direct, “signal-on” and high sensitive impedimetric sensing of DNA
Source: Royal Society of Chemistry journal article supplement (doi:10.1039/c2py20655b), 2012-11-20
Supplement: c2py20655b.pdf [file c2py20655b.pdf]

Ms. Ref. No.: PY-ART-08-2012-020655.R1

## **Supplementary Materials**

### **Electrochemically reduced graphene oxide-enhanced electropolymerization of poly-xanthurenic acid for direct, “signal-on” and high sensitive impedimetric sensing of DNA**

*Tao Yang, Xiao Li, Qianhe Li, Xiuhong Guo, Qian Guan, and Kui Jiao \**

State Key Laboratory Base of Eco-chemical Engineering, College of Chemistry and Molecular Engineering, Qingdao University of Science and Technology, Qingdao 266042, China

### The electroactive surface areas of the electrodes

Also, the electroactive areas of the modified CPEs were obtained according to the Randles-Sevcik equation [1]:

$$i_{pa} = 2.69 \times 10^5 A D^{1/2} n^{3/2} v^{1/2} C$$

where  $i_p$  refers to the anodic peak current,  $n$  is the number of electrons participating in the redox reaction and is equal to 1,  $A$  is the area of the electrode ( $\text{cm}^2$ ),  $D$  is the diffusion coefficient of the molecule and is  $6.70 \times 10^{-6} \text{ cm}^2 \text{ s}^{-1}$ .  $C$  is the concentration of the  $[\text{Fe}(\text{CN})_6]^{3-/4-}$  in the solution and is 1.0 mmol/L, and  $v$  is the scan rate ( $\text{V s}^{-1}$ ).

**Table S1.** The voltammetric parameters of CVs and the electroactive areas of the various electrodes in Fig. 1S

| Electrodes    | $i_{pa}^{[a]}$<br>[ $10^{-5}$ A] | $i_{pc}^{[b]}$<br>[ $10^{-5}$ A] | $E_{pa}^{[c]}$<br>[V] | $E_{pc}^{[d]}$<br>[V] | $\Delta E_p^{[e]}$<br>[V] | Electroactive areas<br>$\text{cm}^2$ |
|---------------|----------------------------------|----------------------------------|-----------------------|-----------------------|---------------------------|--------------------------------------|
| ERGNO/CPE     | 2.940                            | 3.032                            | 0.257                 | 0.050                 | 0.207                     | $0.1377 \pm 0.006$                   |
| PXa/CPE       | 0.120                            | 0.110                            | 0.345                 | 0.080                 | 0.265                     | $0.0499 \pm 0.005$                   |
| PXa/ERGNO/CPE | 2.246                            | 3.084                            | 0.246                 | 0.058                 | 0.188                     | $0.1401 \pm 0.008$                   |

[a] The oxidation peak current. [b] The reduction peak current. [c] The oxidation peak potential. [d] The reduction peak potential. [e] The peak-potential separation.

The active surface areas of ERGNO/CPE, PXa/CPE, PXa/ERGNO/CPE can be calculated to be  $(0.1377 \pm 0.006)$ ,  $(0.0499 \pm 0.005)$  and  $(0.1401 \pm 0.008) \text{ cm}^2$  (average of three measurements), respectively.
